# Supplementary material for: Spatiotemporal Cofilin Signaling, Microglial Activation, Neuroinflammation, and Cognitive Impairment Following Hemorrhagic Brain Injury
Source: MDPI journal article supplement (doi:10.3390/cells12081153), 2023-04-13
Supplement: s1 [file s1]

Supplementary Material

# Spatiotemporal Cofilin Signaling, Microglial Activation, Neuroinflammation and Cognitive Impairment Following Hemorrhagic Brain Injury

Daniyah A. Almarghalani <sup>1</sup>, Xiaojin Sha<sup>2</sup>, Robert E. Mrak<sup>3</sup> and Zahoor A. Shah<sup>4,\*</sup>

<sup>1</sup> Department of Pharmacology and Experimental Therapeutics College of Pharmacy and Pharmaceutical Sciences, University of Toledo, Toledo, 43614, OH, USA

<sup>2</sup> Department of Pathology, College of Medicine, The University of Toledo, Toledo, 43614, OH, USA

<sup>3</sup> Department of Laboratory Medicine and Pathology, University of Washington, Seattle, 98195, WA, USA

<sup>4</sup> Department of Medicinal and Biological Chemistry, University of Toledo, Toledo, 43614, OH, USA

\* Correspondence: zahoor.shah@utoledo.edu

**Table S1.** Cases used for cofilin and microglial immunostaining. Based on the final diagnosis, the cases were classified as control or hemorrhagic brain injury.

| Case | Classification         | Age (y) | Gender | Postmortem Interval (h) | Hemorrhage Brain Area                                                                                                                         |
|------|------------------------|---------|--------|-------------------------|-----------------------------------------------------------------------------------------------------------------------------------------------|
| R1   | Hemorrhage             | 68      | M      | 48                      | massive left-sided cerebral, right-sided cerebellar                                                                                           |
| R2   | Hemorrhage             | 57      | M      | 15                      | massive right intracerebral                                                                                                                   |
| R3   | Hemorrhage             | 48      | F      | 15                      | left cerebral hemorrhage subarachnoid hemorrhage (left cerebral hemisphere, cerebellum)                                                       |
| R4   | Hemorrhage             | 58      | M      | 68                      | Duret hemorrhage of pons, right parietal and temporal lobe hemorrhage                                                                         |
| R5   | Hemorrhage             | 63      | M      | 24                      | intracerebral hemorrhage, bilateral                                                                                                           |
| R6   | Infarction, Hemorrhage | 38      | M      | 24                      | Duret hemorrhage, pons subgaleal hemorrhage, left side                                                                                        |
| R7   | ICH                    | 68      | F      | 48                      | subarachnoid hemorrhage                                                                                                                       |
| R8   | ICH                    | 49      | F      | 24                      | left thalamic hemorrhage                                                                                                                      |
| R9   | ICH                    | 65      | F      | 24                      | intraparenchymal pontine hemorrhage with extravasation to the subarachnoid space                                                              |
| R10  | Recurrent ICH          | 71      | M      | 24                      | recurrent ICH, ICH- right front lobe, left basal ganglia                                                                                      |
| RN1  | Control                | 43      | M      | 24                      | myocardial infarction, ARDS                                                                                                                   |
| RN2  | Control                | 58      | F      | 66                      | ruptured abdominal aortic aneurysm                                                                                                            |
| RN3  | Control                | 83      | M      | 48                      | respiratory failure, heart failure angiodysplasia, diverticulosis, acute hemorrhagic gastritis acute tubular necrosis, chronic pyelonephritis |
| RN4  | Control                | 65      | M      | 48                      | pulmonary embolism                                                                                                                            |
| RN5  | Control                | 58      | F      | 72                      | hepatic cirrhosis with portal hypertension ruptured esophageal varices                                                                        |
| RN6  | Control                | 43      | F      | 24                      | Bilateral pulmonary artery thromboemboli                                                                                                      |
| RN7  | Control                | 24      | F      | 72                      | acute heart and respiratory failure                                                                                                           |
| RN8  | Control                | 55      | M      | 24                      | multiple pulmonary artery thromboemboli sickle cell disease                                                                                   |

**Table S2.** Shows primer sequence for each gene.

| Targets       | Primers             | Sequences                      | References |
|---------------|---------------------|--------------------------------|------------|
| 18S           | Forward (Sense)     | 5'-CCTGGATACCGCAGCTAGGA-3'     | [68]       |
|               | Reverse (Antisense) | 5'-GCGGCGCAATACGAATGCCCC-3'    |            |
| IL-1 $\beta$  | Forward (Sense)     | 5'-CCAGCTTCAAATCTCACAGCAG-3'   | [69]       |
|               | Reverse (Antisense) | 5'-CTTCTTTGGGTATTGCTTGGGATC-3' |            |
| TNF- $\alpha$ | Forward (Sense)     | 5'-CACAGAAAGCATGATCCGCGACGT-3' | [69]       |
|               | Reverse (Antisense) | 5'-CGGCAGAGAGGAGGTTGACTTTCT-3' |            |
| IL-6          | Forward (Sense)     | 5'-TCCAGTTGCCTTCTTGGGAC-3'     | [69]       |
|               | Reverse (Antisense) | 5'-GTACTCCAGAAGACCAGAGG-3'     |            |
| IL-10         | Forward (Sense)     | 5'-TGGCCCAGAAATCAAGGAGC-3'     | [69]       |
|               | Reverse (Antisense) | 5'-CAGCAGACTCAATACACACT-3'     |            |
| TGF- $\beta$  | Forward (Sense)     | 5'-GACCGCAACAACGCCATCTA-3'     | [69]       |
|               | Reverse (Antisense) | 5'-GGCGTATCAGTGGGGGTCAG-3'     |            |
| Arg1          | Forward (Sense)     | 5'-CCACGGTCTGTGGGGAAAGCCAAT-3' | [70]       |
|               | Reverse (Antisense) | 5'-CTGCCAGACTGTGGTCTCCACCCA-3' |            |
| IBA1          | Forward (Sense)     | 5'-GTCCTTGAAGCGAATGCTGG-3'     | [71]       |
|               | Reverse (Antisense) | 5'-CATTCTCAAGATGGCAGATC-3'     |            |

**Neurobehavioral tests:***A- Neurological deficit scoring (NDS)*

NDS is a 28-point scoring system used to evaluate sensory and motor deficits following ICH [72]. Seven tests were graded from zero (no deficit) to four (severe deficit) and evaluated after ICH, seven tests: body symmetry, gait, climbing, circling behavior, whisker response, compulsory circling, and front limb symmetry

*A- Rotarod test*

Rotarod was used to evaluate the deficits in motor coordination following ICH as previously described [34]. In brief, a mouse was placed on a moving rod of rotarod that was adjusted to rotate at 1 RPM, and speed increased by 1 RPM every 10 s until the mouse fell off. The trial ends when the mouse falls from the rod, and the time is recorded. Animals were trained on the Rotarod 3–7 days and 24 h before the surgery, considered the baseline and after ICH (each animal was tested three times per trial, and the average value was utilized for the statistical analysis).

*A- Grip strength test*

Grip strength was used to measure the strength of the forelimb muscles of the mouse following ICH. Animal forelimbs were placed on a pull bar assembly by holding it by the tail. The maximum force exerted by the animal and displayed on the digital screen was recorded (each animal was tested three times per trial, and the mean value was used for statistical analysis). The reported scores were recorded three days before ICH was used as the baseline and after ICH.

*A- T-maze*

T-maze was used to assess spatial learning and cognitive impairment [73]. We used the spontaneous alternation protocol described previously [74] with minor modifications. Each trial started by placing the mouse on the central arm and exploring both arms for 2 min; once the mouse chose a particular goal arm, the arm was blocked, and the mouse was removed after 30 s. The mouse was placed back into the cage for 30 s, and the block was removed from the maze. Then the mouse was placed in the start arm, allowing the mouse to choose the arm. We run two sets/day for four days. The correct choice was recorded when the second run was different from the first in a given set, and the incorrect choice was recorded when the mouse chose the same arm similar to the previous run. We calculated the percentage of alteration and the rate of side preference.

$$\% \text{Alteration} = (\text{Correct choice} / \text{Total set}) * 100$$

$$\% \text{Side Preference} = (\text{Preferred side} / \text{Total run}) * 100$$

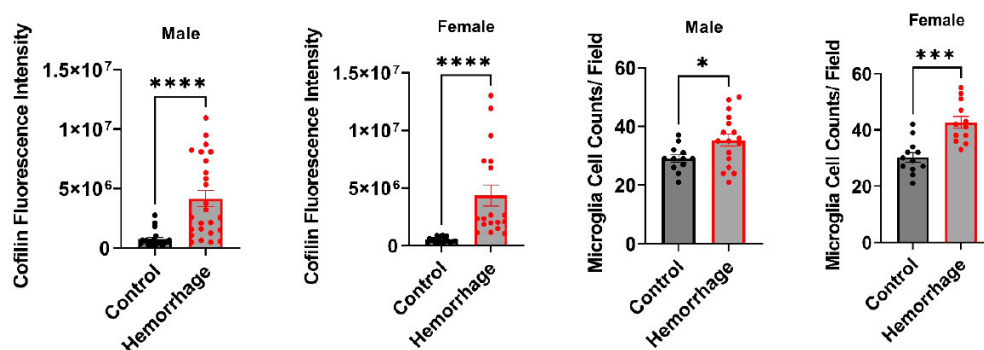

**Figure S1.** Cofilin and microglial counts in male and female ICH patients. Immunofluorescence analysis of cofilin intensity and microglia counts in male and female ICH patients compared to the control group were performed using ImageJ software. Data are expressed as mean ± SEM, where  $p < 0.05$  was considered significant ( $n = 8$  control,  $n = 10$  ICH, unpaired Student's  $t$ -test). \*  $p < 0.05$ , \*\*\*  $p < 0.001$ , \*\*\*\*  $p < 0.0001$ .

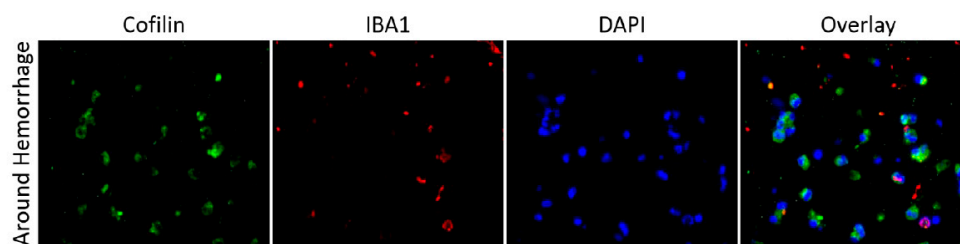

**Figure S2.** Cofilin localization in and around the nucleus of human ICH patient brain sections (Scale bar 20 μm). Immunohistochemistry staining indicated that cofilin localized around and in the nucleus of ICH patients.

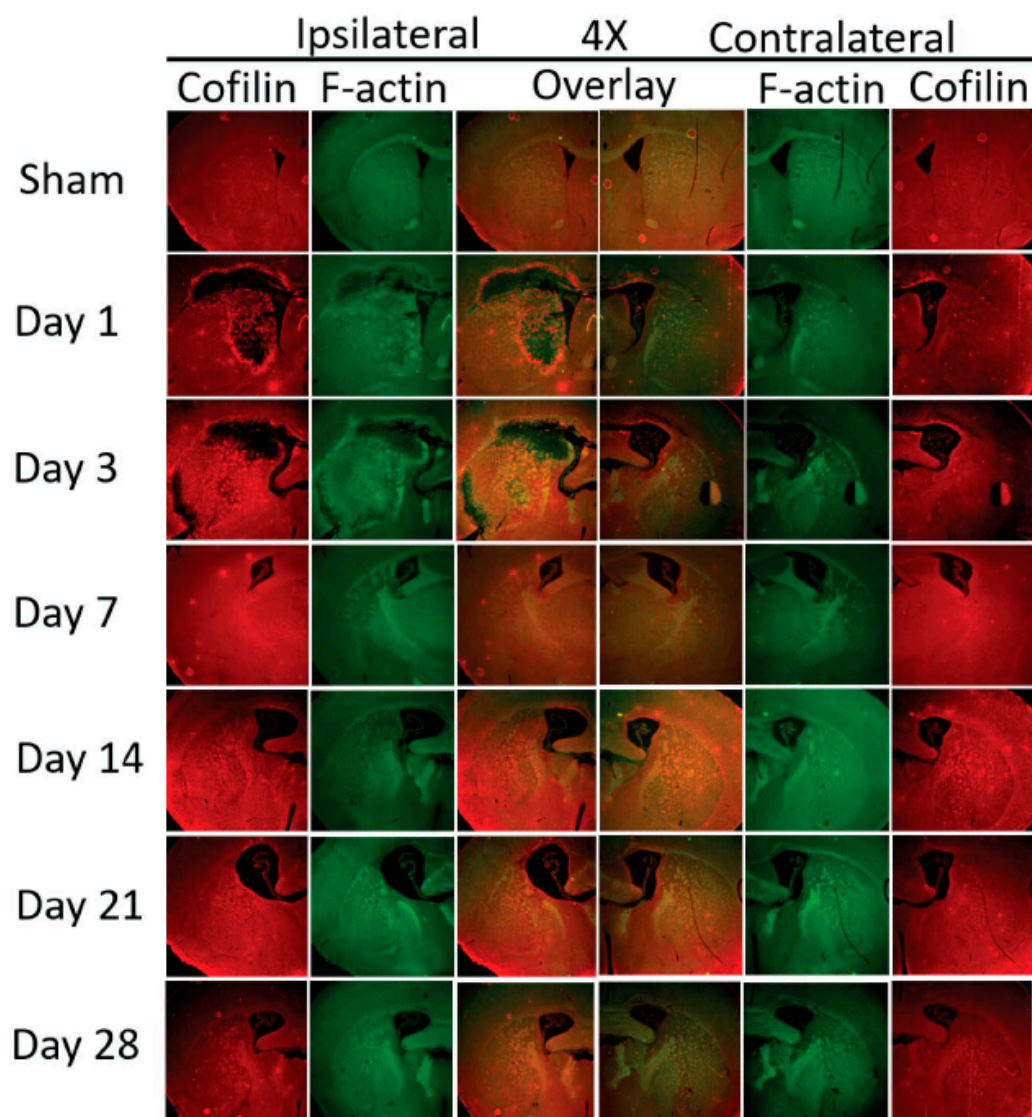

**Figure S3.** Immunohistochemistry staining of cofilin and F-actin around the hemorrhagic region after ICH. Anti-cofilin (a marker of active cofilin) and anti-F-actin (a filamentous actin) were used to stain the paraffin-embedded brain sections (Scale bar 200  $\mu$ m). The data showed cofilin-actin rods/aggregates after ICH at different time points (sham, days 1, 3, 7, 14, 21, and 28).
